# Supplementary material for: Comparative Transcriptome Analysis Identified Candidate Genes for Late Leaf Spot Resistance and Cause of Defoliation in Groundnut
Source: MDPI journal article supplement (doi:10.3390/ijms22094491), 2021-04-26
Supplement: s1 [file s1]

## GPBD4

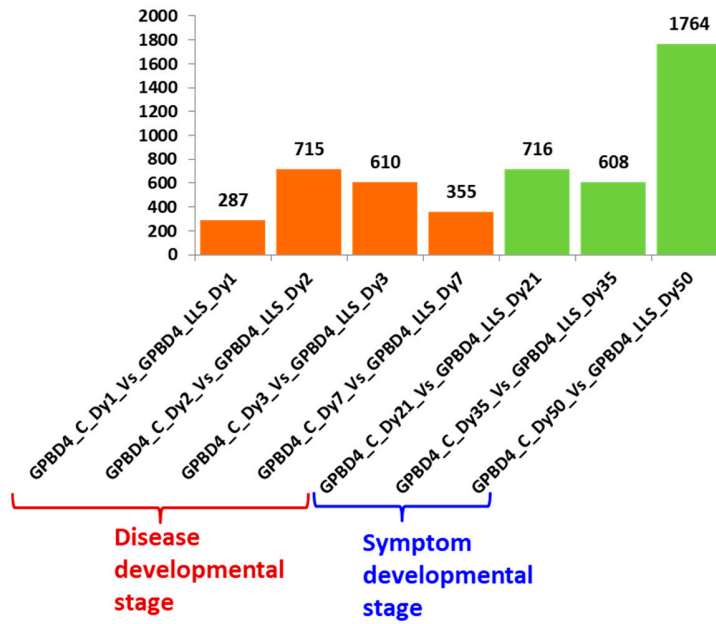

## ICGV 13208

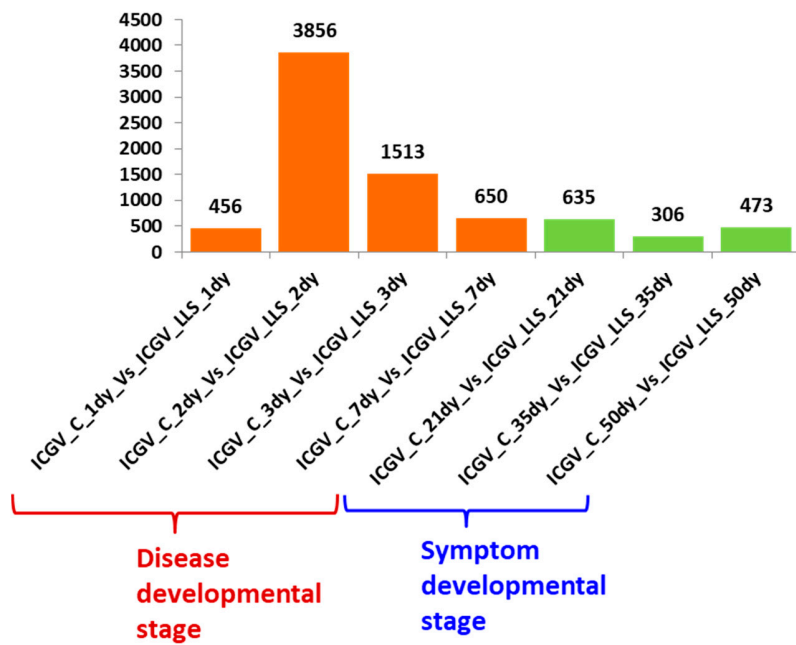

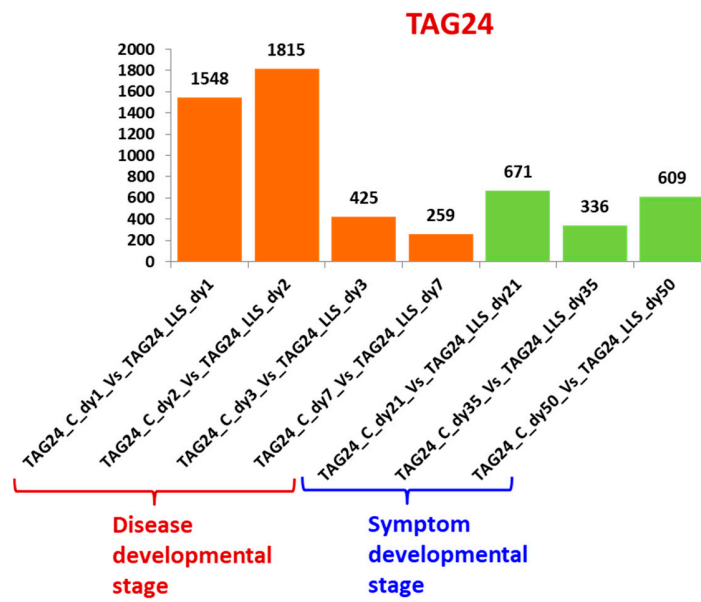

**Figure S1.** Total number of DEGs (upregulated and downregulated) expressed in resistant (GPBD4 and ICGV13208) and susceptible genotypes (TAG24) in control vs stress condition at 1DPI, 2DPI, 3DPI, 7DPI, 21DPI, 35DPI and 50DPI under *P. personata* infection.

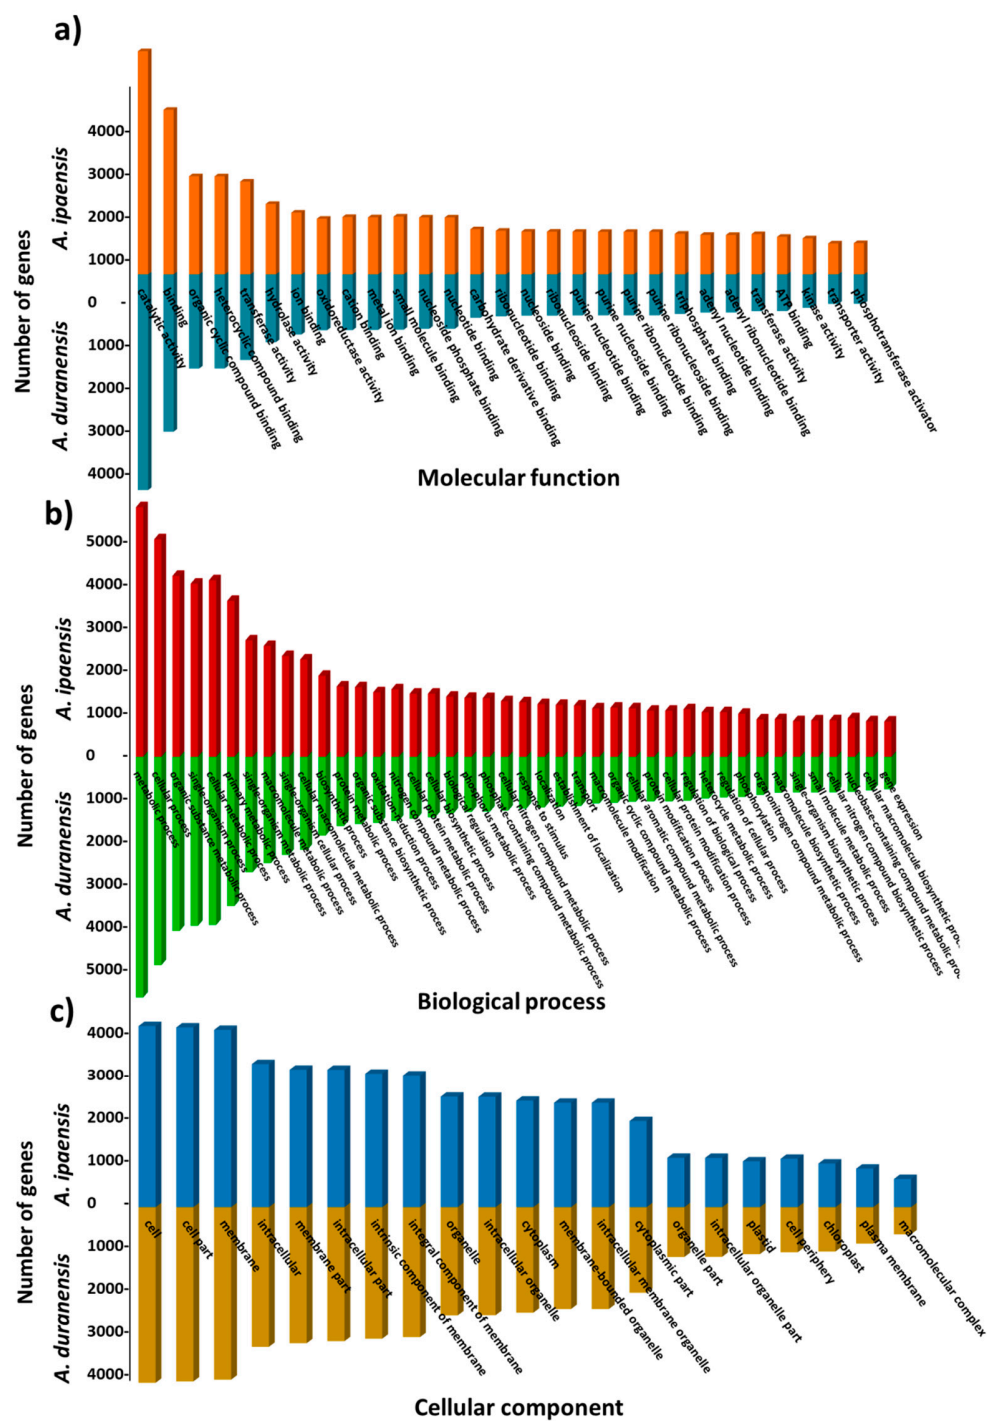

**Figure S2.** Gene ontology annotation of differentially expressed genes in both subgenomes *A. duranensis* and *A. ipaensis*. Bi-directional bar plots representing GO annotations of three major categories and subcategories (a) biological process, (b) molecular function, (c) cellular components.
